# Supplementary material for: Hydrophilic glutathione-modified flower-like hollow covalent organic frameworks for highly efficient capture of N-linked glycopeptides
Source: Royal Society of Chemistry journal article supplement (doi:10.1039/d2tb01403c), 2022-01-01
Supplement: d2tb01403c1.pdf [file d2tb01403c1.pdf]

1 **Hydrophilic glutathione-modified flower-like hollow covalent**  
2 **organic frameworks for highly efficient capture of N-linked**  
3 **glycopeptides**

4  
5 Yin Ji<sup>a</sup>, Yanting He<sup>b</sup>, Ruibing chen<sup>c</sup>, Chao Zhong<sup>a</sup>, Heming Li<sup>a</sup>, Yijing Wu<sup>a</sup>, Zian Lin<sup>a\*</sup>

6  
7 <sup>a</sup> Ministry of Education Key Laboratory of Analytical Science for Food Safety and  
8 Biology, Fujian Provincial Key Laboratory of Analysis and Detection Technology for  
9 Food Safety, College of Chemistry, Fuzhou University, Fuzhou, Fujian, 350108, China

10 <sup>b</sup> School of Pharmacy, Bengbu Medical University, 2600 Donghai Avenue, Bengbu,  
11 Anhui, 233000, China

12 <sup>c</sup> School of Pharmaceutical Science and Technology, Tianjin University, Tianjin  
13 300072, China

14

15

16 ● **Corresponding author:** Zian Lin;

17 ● **Postal address:** College of Chemistry, Fuzhou University,

18 Fuzhou, Fujian, 350108, China

19 ● **Fax:** 86-591-22866135

20 **E-mail:** [zianlin@fzu.edu.cn](mailto:zianlin@fzu.edu.cn) (Z. Lin)

21

22

23

24

25

## 26 **Experimental Section**

### 27 **Chemicals and reagents**

28 All chemicals and reagents were analytical grade or better and used without further  
29 purification. 1,3,5-Tris(4-aminophenyl)benzene (TPB), 2,5- divinylnitroterephthalaldehyde  
30 (DVA) were obtained from Jilin Chinese Academy of Sciences-Yanshen Technology  
31 Co., Ltd. Ethanol, acetonitrile (ACN, HPLC grade) were purchased from Sinopharm  
32 Chemical Reagent, Co., Ltd (Shanghai, China). Hydrogen tetrachloroaurate (III)  
33 trihydrate ( $\text{H}_7\text{AuCl}_4\text{O}_3$ ), sodium citrate (SC), tannic acid (TA), and potassium  
34 carbonate ( $\text{K}_2\text{CO}_3$ ), glutathione (GSH), acetic acid and trifluoroacetic acid (TFA) were  
35 purchased from Aladin (Shanghai, China). Iodacetamide (IAA), 1,4-dithiothreitol  
36 (DTT), 2,5-dihydroxybenzoic acid (2,5-DHB), horseradish peroxidase (HRP), bovine  
37 serum albumin (BSA), PNGase F (Glycerol-free) and TPCK-treated trypsin were  
38 purchased from Sigma-Aldrich (St. Louis, MO). Healthy human serum was supplied  
39 by Fujian Provincial Official Hospital (Fuzhou, China). Deionized water ( $18.2 \text{ M}\Omega$   
40  $\text{cm}^{-1}$ ) was purified with Milli-Q water system (Millipore, USA).

### 41 **Characterization**

42 Transmission electron microscopies (TEM) images were obtained by the Hitachi  
43 HT7700 with an accelerating voltage of 100 kV. Scanning electron microscopies  
44 (SEM) measurement was performed on a Verios G4 scanning electron microscope. The  
45 high-angle annular dark-field scanning TEM (HAADF-STEM) was carried out by a  
46 FEI Tecnai G2 F20 S-Twin HRTEM operating at 200 kV. A Micromeritics 3020M was  
47 used to analysis the  $\text{N}_2$  adsorption/desorption isotherms at 77K. The samples were

48 degassed by vacuum at 120 °C for 10 h before analysis. Powder X-ray diffraction  
49 (XRD) patterns were conducted at a scan rate of 5° min<sup>-1</sup> over a range of 2.5-80° (2θ)  
50 on a X'Pert-Pro MPD (Philips, Holland) power diffractometer with Cu-Kα source  
51 (λ=1.5418 Å). Fourier-transform infrared spectra (FT-IR) were collected by attenuated  
52 total reflectance (ATR) on a Nicolet iS50 spectrometer (Thermo Fisher, USA) with the  
53 wave number range of 4000-400 cm<sup>-1</sup>. The contact angles were measured by a contact  
54 angle analyzer (HAKER-SPCAX1). Thermogravimetric analysis (TGA) was carried  
55 out on a STA449C/6/G analyzer from 30 to 1000 °C under Ar<sub>2</sub> atmosphere with a ramp  
56 rate of 10 °C min<sup>-1</sup>. The zeta potential was measured by dynamic light scattering  
57 (Zetasizer NanoZS90, Malvern). The X-ray photoelectron spectra (XPS) was analyzed  
58 by a Thermo Scientific ESCALAB 250. All matrix-assisted laser desorption ionization  
59 time-of-flight mass spectrometry (MALDI-TOF MS) analysis were performed in  
60 reflector positive-ion mode on a Bruker autoflex speed MALDI-TOF/TOF MS  
61 equipped with the Nd: YAG laser at 355 nm.

## 62 **Synthesis of the HFH-COFs@Au@GSH**

### 63 **Synthesis of the HFH-COFs**

64 The HFH-COFs were prepared at room temperature according to the previous  
65 literature with slight modification. In brief, 1,3,5-tris(4-aminophenyl)benzene (TPB,  
66 0.04 mmol) and 2,5-divinylterephthalaldehyde (DVA, 0.06 mmol) were dispersed in 5  
67 mL of ACN with 8% H<sub>2</sub>O and sonicated for 20 s to dissolve the building blocks  
68 completely. After that, 1.0 mL of HAc (17.4 M) was added and sonicated for 10 s. Then  
69 the mixture was incubated at room temperature for 72 h. The obtained yellow

70 precipitates were collected by centrifugation at 12000 rpm for 3 min and washed with  
71 acetonitrile and ethanol for three times, respectively. Eventually, the yellow powders  
72 were dried overnight at 60 °C under vacuum for use.

### 73 **Synthesis of the HFH-COFs@Au**

74 The yellow product (20 mg) was dispersed in 4 mL of deionized water and the  
75 mixture was sonicated for 10 min to completely disperse the HFH-COFs. 7.5 mg of  
76  $H_7AuCl_4O_3$  was added to the above mixture solution and shaken for 30 min vigorously.  
77 Sodium citrate (SC, 75.0 mg), tannic acid (TA, 0.30 mg) and potassium carbonate  
78 ( $K_2CO_3$ , 15.80 mg) were added in a round-bottom flask (100 mL) along with 50 mL of  
79 water. After heating the flask to 70°C, the prepared above solution was injected and  
80 was kept at 70 °C under strenuous stirring for 20 min to get brown product HFH-  
81 COFs@Au. The obtained brown precipitates were collected by centrifugation at 12000  
82 rpm for 3 min and washed with deionized water for three times and dried for 16 h at 60  
83 °C in vacuum to give brown powders.

### 84 **Synthesis of the HFH-COFs@Au@GSH**

85 The HFH-COFs@Au@GSH were obtained through the reaction between the  
86 HFH-COFs@Au (20 mg) and glutathione (100 mg) at room temperature for 24 h. The  
87 obtained precipitates were washed with deionized water for three times and dried in  
88 vacuum at 60 °C for 16 h.

### 89 **Digestion of standard proteins and biosample**

90 1 mg of HRP was added to 1 mL of  $NH_4HCO_3$  solution (50 mM, pH 8.3). The protein  
91 solution was kept at 100 °C for 10 min to denature the proteins. After cooled to room

92 temperature, 20  $\mu\text{g}$  of trypsin was added to digest the proteins at 37  $^{\circ}\text{C}$  for 16 h. The  
93 procedure of digest of BSA was different from that of HRP. 10 mg of BSA was added  
94 to 500  $\mu\text{L}$  of  $\text{NH}_4\text{HCO}_3$  solution (50 mM, pH 8.3) containing urea (8 M) and denatured  
95 at 56  $^{\circ}\text{C}$  for 15 min. The protein solution was then reduced by 110  $\mu\text{L}$  100 mM DTT at  
96 56  $^{\circ}\text{C}$  for 1 h and further alkylated by 270  $\mu\text{L}$  100 mM IAA at 37  $^{\circ}\text{C}$  for 30 min in the  
97 dark. Finally, the protein solution was diluted to 2 mL and digested by 200  $\mu\text{g}$  of trypsin  
98 at 37  $^{\circ}\text{C}$  for 16 h. These resulted tryptic digests were stored at -20  $^{\circ}\text{C}$  for further use. 5  
99  $\mu\text{L}$  of human serum was firstly diluted with 50  $\mu\text{L}$   $\text{NH}_4\text{HCO}_3$  solution (50 mM, pH 8.3)  
100 and denatured at 100  $^{\circ}\text{C}$  for 10 min. The mixture was reduced by using 100  $\mu\text{L}$  DTT  
101 (1M) at 60  $^{\circ}\text{C}$  for 1h and alkylated by 7.5mg IAA at 37  $^{\circ}\text{C}$  for 1 h in the dark. After  
102 that, the obtained solution was digested with trypsin (trypsin:protein, 1:40, w/w) at 37  
103  $^{\circ}\text{C}$  for 16 h. Finally, the tryptic digest was lyophilized and stored at -20  $^{\circ}\text{C}$  until use.

#### 104 **Enrichment protocol for standard proteins and complex biological samples.**

105 For standard proteins, the HFH-COFs@Au@GSH (200  $\mu\text{g}$ ) were suspended into  
106 100  $\mu\text{L}$  of loading buffer (95% ACN/0.1% TFA including 10  $\mu\text{L}$  of the HRP tryptic  
107 digest). The above mixture was sonicated for a few seconds and incubated for 30 min  
108 at room temperature. After centrifugation and removal of supernatant, the HFH-  
109 COFs@Au@GSH were washed with 100  $\mu\text{L}$  of washing buffer (95% ACN involving  
110 0.1% TFA) for three times to remove nonspecific binding. Eventually, the target N-  
111 glycopeptides were eluted with elution buffer (30% ACN containing 0.1% TFA) by  
112 sonication for 20 min and then analyzed by MALDI-TOF MS.

113 For the enrichment of N-linked glycopeptides in human serum, first of all, 200  $\mu\text{g}$

114 of the HFH-COFs@Au@GSH were suspended into 100  $\mu\text{L}$  of loading buffer (95%  
115 ACN/0.1% TFA including 10  $\mu\text{L}$  of tryptic digest of serum supernatant). After  
116 incubated for 30 min, the above mixture was washed with washing buffer (95% ACN  
117 involving 0.1% TFA), and eluted with elution buffer (30% ACN containing 0.1% TFA).  
118 The eluent was lyophilized and redissolved into a lysis solution containing 17  $\mu\text{L}$  of  
119  $\text{H}_2\text{O}$ , 2  $\mu\text{L}$  of glycobuffer and 1  $\mu\text{L}$  of PNGase F. After 16 h of the deglycosylation  
120 process at 37  $^\circ\text{C}$ , the obtained peptides were lyophilized for timsTOF Pro analysis.

#### 121 **MALDI-TOF MS analysis**

122 In brief, 1  $\mu\text{L}$  of eluate was dropped on the sample plate and air-dried. Subsequently,  
123 1  $\mu\text{L}$  of matrix solution (25  $\text{mg mL}^{-1}$  DHB in 50% ACN/49% $\text{H}_2\text{O}$ /1%  $\text{H}_3\text{PO}_4$ ) was  
124 covered on the eluate. The captured phosphopeptides were identified by Bruker  
125 autoflex speed MALDI-TOF/TOF MS in reflector positive-ion mode equipped with the  
126 Nd: YAG laser (355 nm), the repetition rate (2000 Hz), and the acceleration voltage (20  
127 kV).

#### 128 **TimsTOF Pro MS analysis**

129 Human serum samples were analyzed on a nanoElute (Bruker) coupled to a timsTOF  
130 Pro (Bruker) equipped with a Captive Spray source. Peptides were dissolved in 10  $\mu\text{L}$   
131 of 0.1% formic acid and were auto-sampled directly onto a homemade C18 column (35  
132  $\text{cm} \times 75 \mu\text{m}$  i.d., 1.9  $\mu\text{m}$  100  $\text{\AA}$ ). Samples were then eluted for 60 min with linear  
133 gradients of 3–35% acetonitrile in 0.1% formic acid at a flow rate of 300  $\text{nL/min}$ . Mass  
134 spectra data were acquired with a timsTOF Pro mass spectrometer (Bruker) operated in  
135 PASEF mode. The raw files were analyzed by Peaks Studio X software against uniprot

136 database.

137

138

139

140

141

142

143

144

145

146

147

148

149

150

151

152

153

154

155

156

157

158

159

## 160 **Supplementary figures**

161

162

163

164

165

166

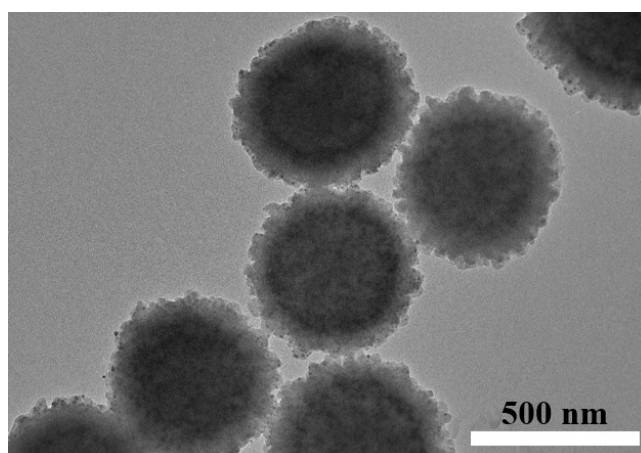

167

168

**Fig. S1** TEM images of the HFH-COFs@Au.

169

170

171

172

173

174

175

176

177

178

179

180

181

182



183  
184  
185  
186  
187  
188  
189  
190  
191  
192  
193  
194  
195  
196  
197  
198  
199

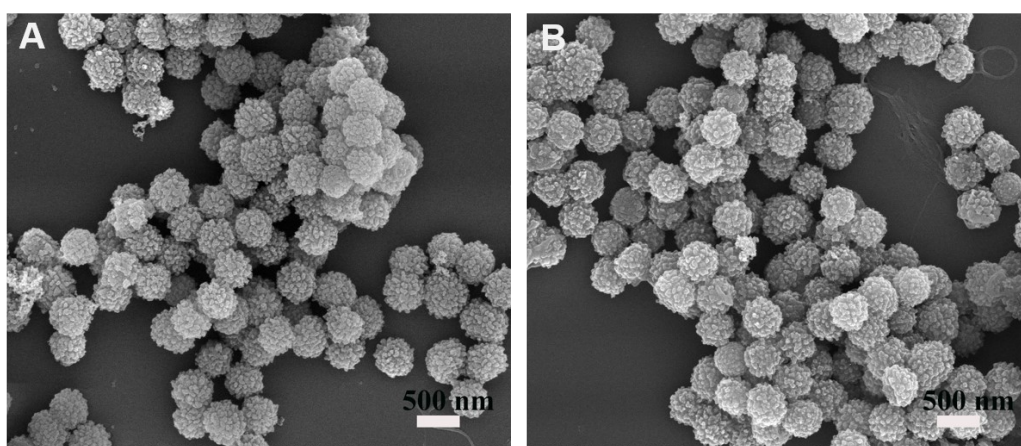

200  
201  
202  
203  
204  
205  
206  
207  
208  
209  
210  
211  
212  
213  
214  
215

**Fig. S2** SEM images of (A) HFH-COFs@Au, and (B) HFH-COFs@Au@GSH.

216  
217  
218  
219  
220  
221  
222  
223  
224  
225  
226  
227

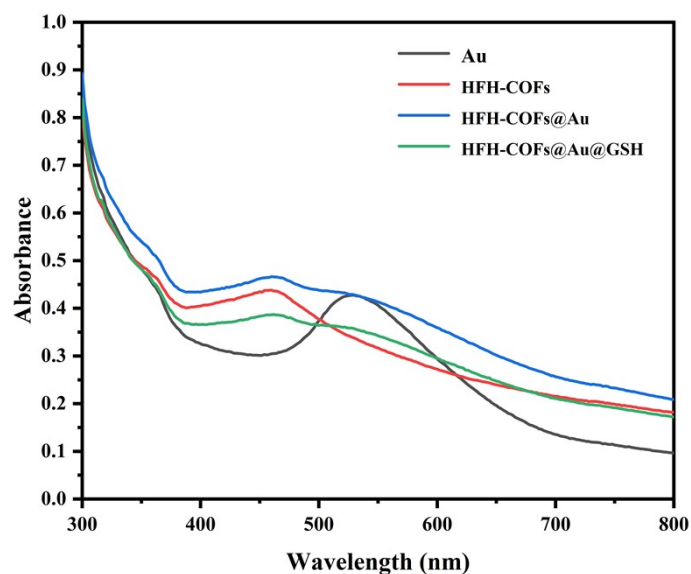

228  
229  
230  
231  
232  
233  
234  
235  
236  
237  
238  
239  
240  
241  
242  
243  
244  
245  
246

**Fig. S3** UV-visible spectra of Au NPs, HFH-COFs, HFH-COFs@Au, and HFH-COFs@Au@GSH

247  
248  
249  
250  
251  
252  
253  
254  
255  
256

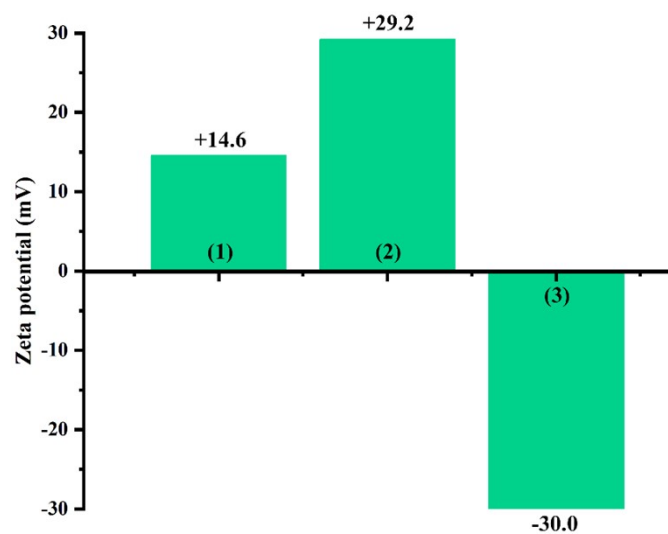

257  
258  
259  
260  
261  
262  
263  
264  
265  
266  
267  
268  
269  
270  
271  
272  
273  
274  
275  
276  
277  
278

**Fig. S4** Zeta potential of (1) HFH-COFs, (2) HFH-COFs@Au and (3) HFH-COFs@Au@GSH.

279  
280  
281  
282  
283  
284  
285  
286  
287  
288

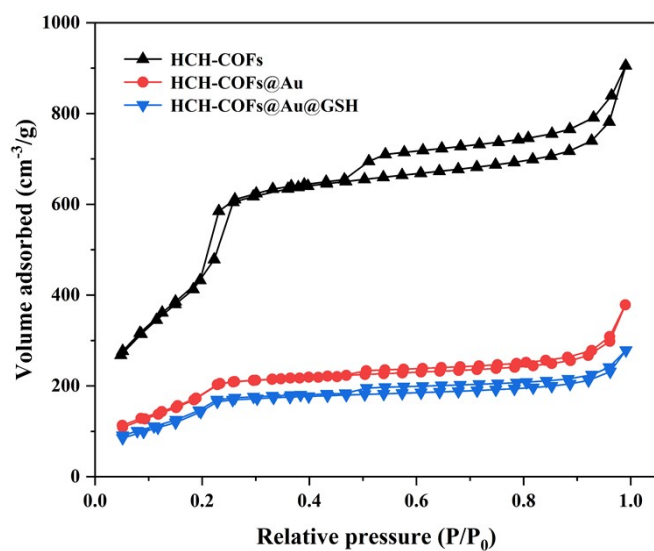

289

290 **Fig. S5** Nitrogen adsorption and desorption isotherms of the HFH-COFs, HFH-

291

COFs@Au, and HFH-COFs@Au@GSH.

292

293

294

295

296

297

298

299

300

301

302

303

304

305

306

307

308

309  
310  
311  
312  
313  
314  
315  
316  
317  
318

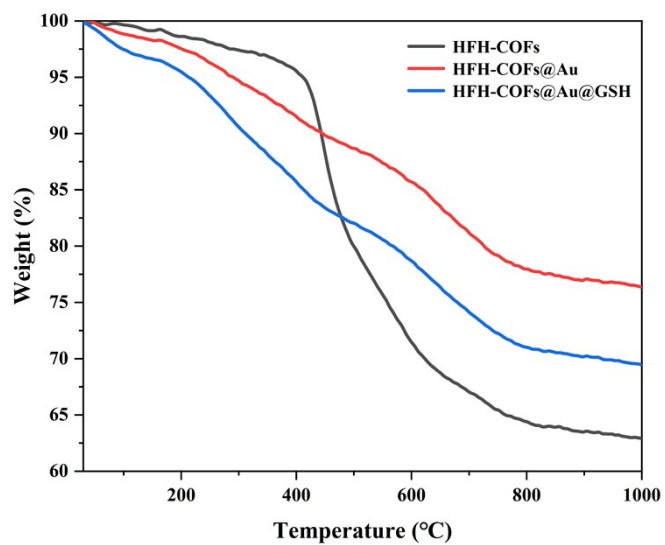

319  
320  
321  
322  
323  
324  
325  
326  
327  
328  
329  
330  
331  
332  
333  
334  
335  
336  
337  
338  
339

**Fig. S6** TGA analysis of the HFH-COFs, HFH-COFs@Au and HFH-COFs@Au@GSH.

340  
341  
342  
343  
344  
345  
346

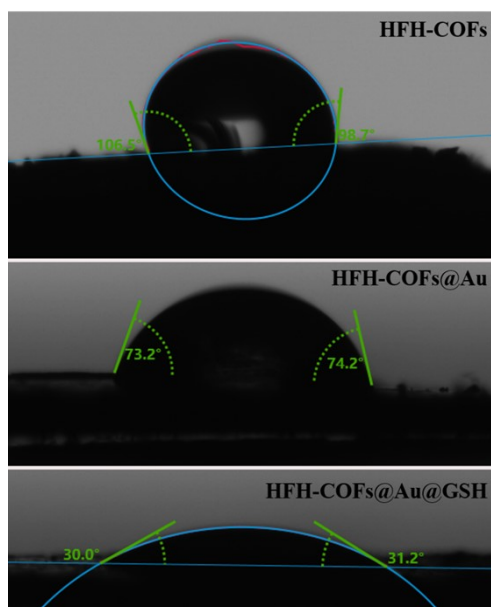

347  
348  
349  
350  
351  
352  
353  
354  
355  
356  
357  
358  
359  
360  
361  
362  
363  
364  
365  
366  
367  
368

**Fig. S7** Contact angles of the HFH-COFs, HFH-COFs@Au and HFH-COFs@Au@GSH.

369  
370  
371  
372  
373  
374  
375

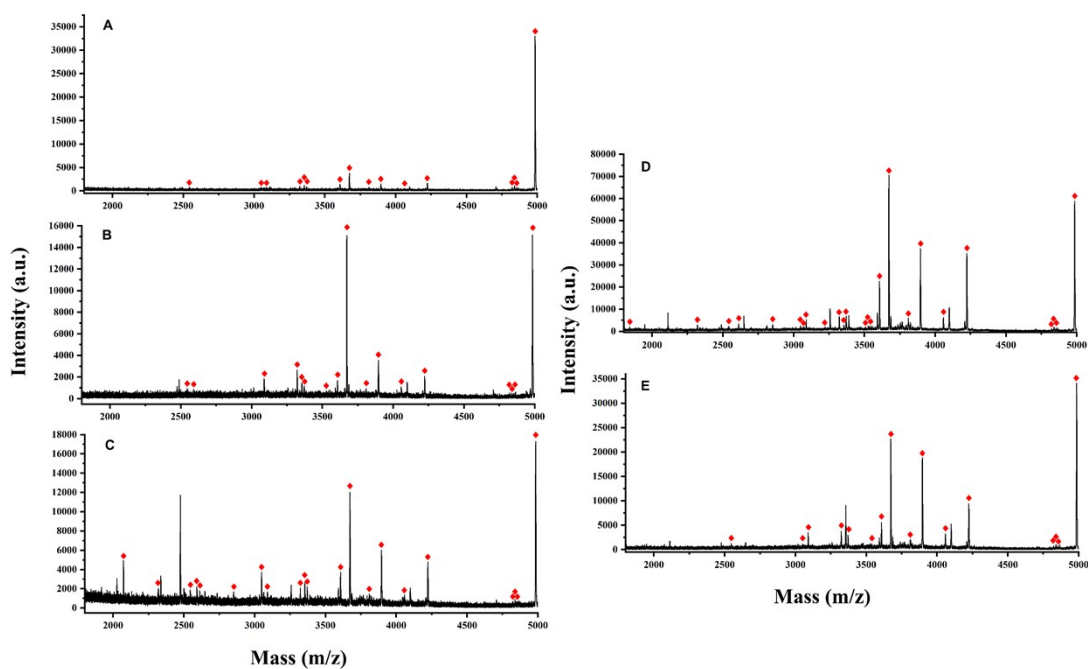

376

377 **Fig. S8** MALDI-TOF mass spectrometry of HRP trypsin digest by the HFH-  
378 COFs@Au@GSH with different gold content (A) 1.0 mg, (B) 2.5 mg (C) 5.0 mg (D)  
379 7.5 mg, and (E) 10.0 mg. Glycopeptide peaks are marked with “\*”

380  
381  
382  
383  
384  
385  
386  
387  
388

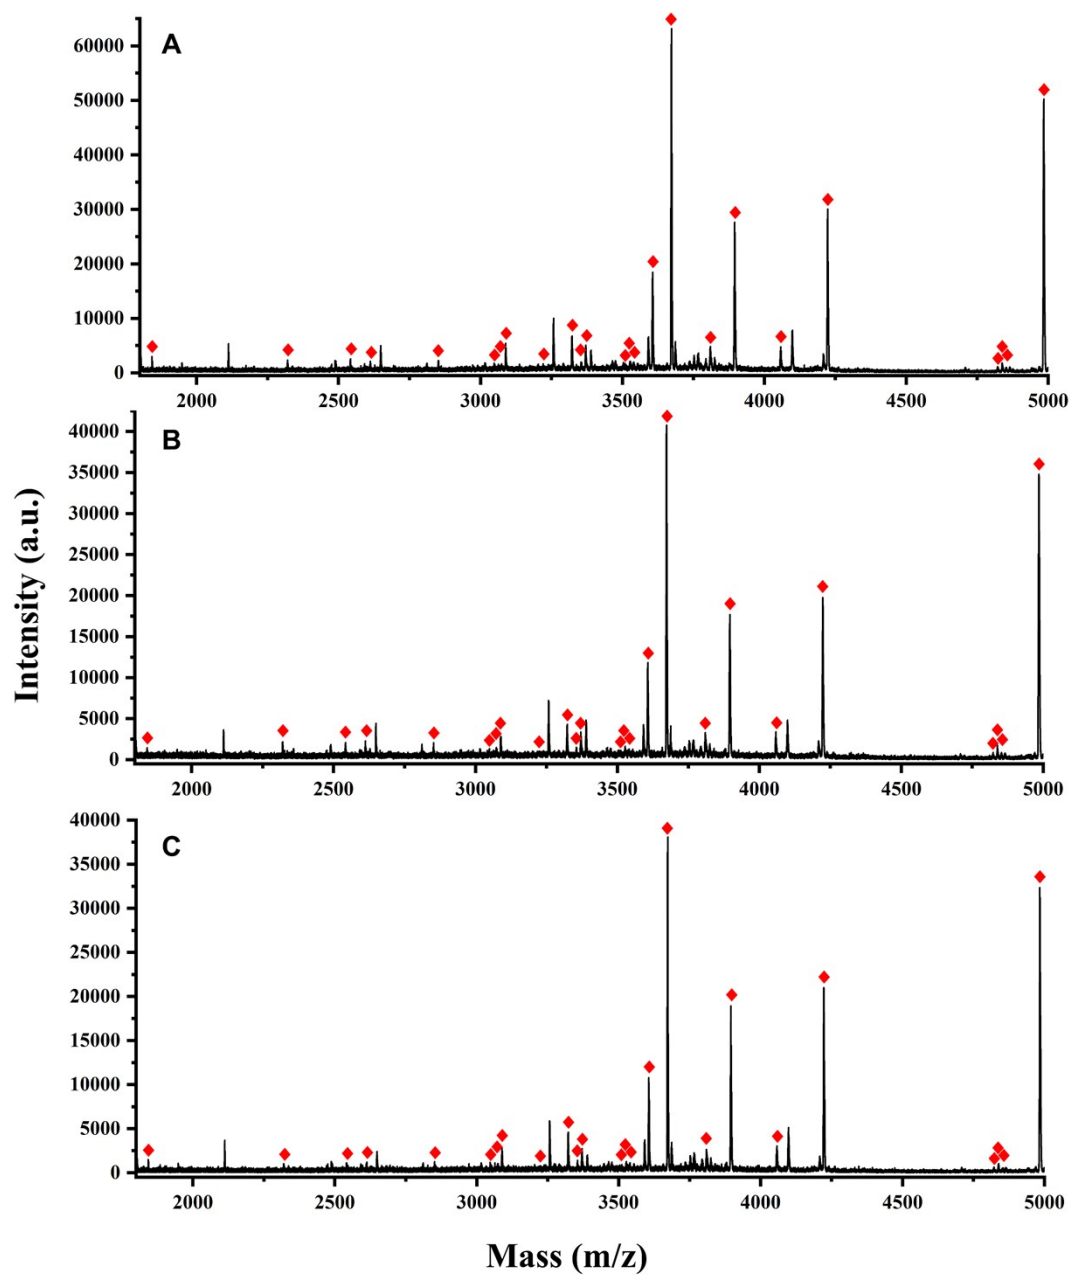

390

391 **Fig. S9** MALDI-TOF mass spectra of the tryptic digests of HRP after enrichment by  
392 the same batch of the HFH-COFs@Au@GSH for the (A) first time, (B) third time, and

393 (C) fifth time. Glycopeptide peaks are marked with “\*”

394

395

396



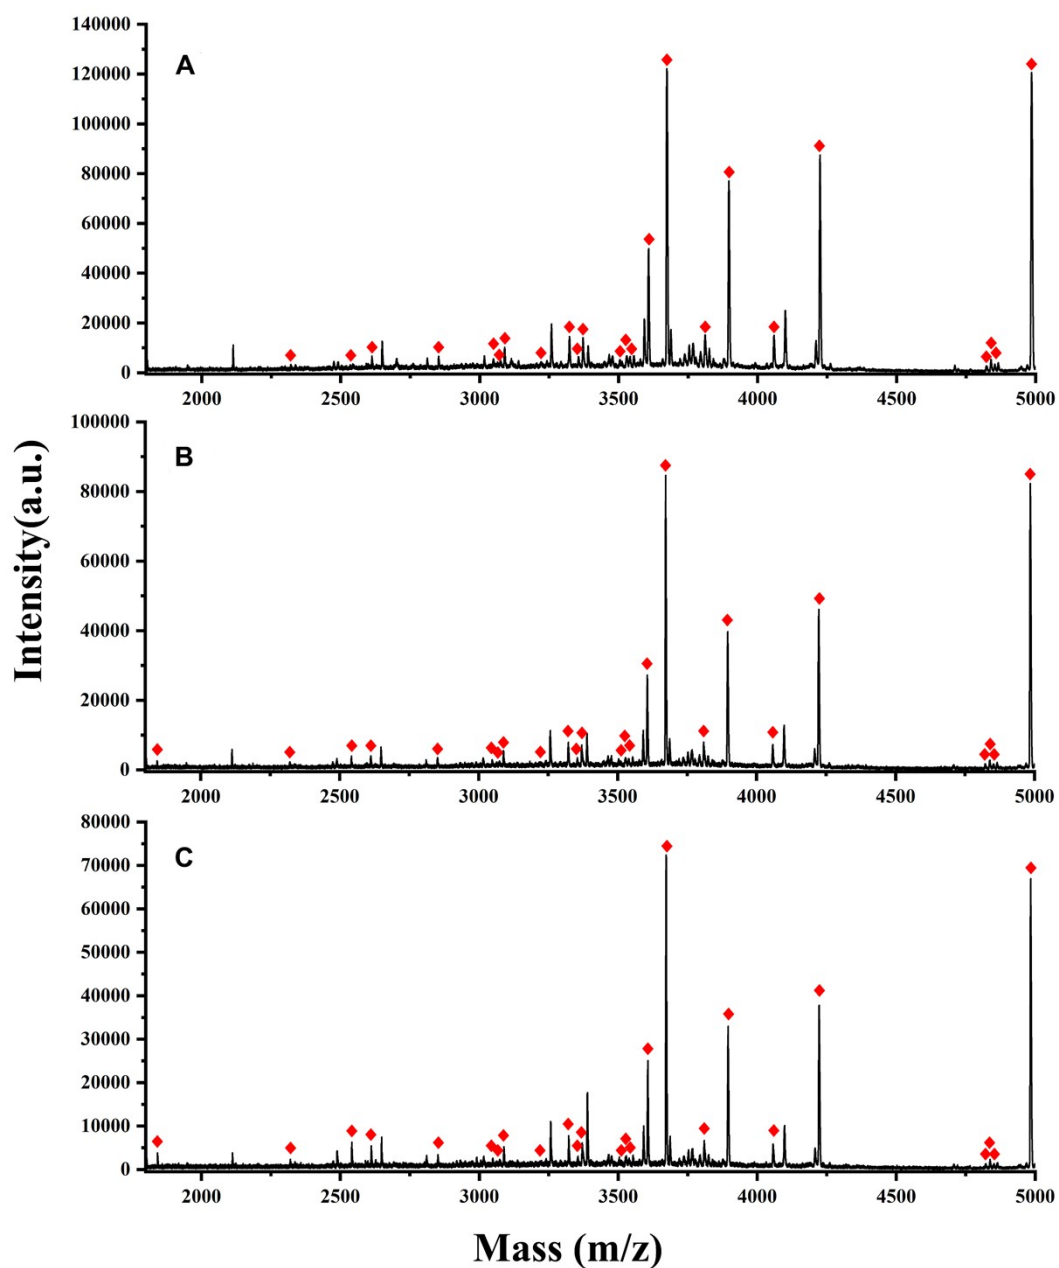

398

399 **Fig. S10** MALDI-TOF mass spectra of HRP tryptic digest after enrichment by the  
400 HFH-COFs@Au@GSH stored in water for (A) one months, (B) three months, and (C)

401 five months, respectively. Glycopeptide peaks are marked with “\*”

402

403

404

405

406

407

408 Table S1 XPS element analysis of the HFH-COFs@Au@GSH.

| Element      | Weight% | Atomic% |
|--------------|---------|---------|
| <b>C</b>     | 44.18   | 70.12   |
| <b>N</b>     | 5.76    | 7.84    |
| <b>O</b>     | 13.92   | 16.57   |
| <b>S</b>     | 3.98    | 2.37    |
| <b>Au</b>    | 32.16   | 3.11    |
| <b>Total</b> | 100     | 100     |

409

410

411

412

413

414

415

416

417

418

419

420

421

422 Table S2 Detailed information about the identified N-glycopeptides captured by the  
423 HFH-COFs@Au@GSH from the tryptic digest of HRP. The lower case letter n represent  
424 N-glycosylation site.

| NO. | Glycan composition                | Peptide sequence                   | Observed m/z |
|-----|-----------------------------------|------------------------------------|--------------|
| 1   | XylMan3FucGlcNAc2                 | NVGLnR                             | 1842         |
| 2   | Man2GlcNAc2                       | MGnITPLTGTQGQIR                    | 2320         |
| 3   | XylMan3FucGlcNAc2                 | SSPnATDTIPLVR                      | 2541         |
| 4   | XylMan3GlcNAc2                    | MGnITPLTGTQGQIR                    | 2611         |
| 5   | FucGlcNAc                         | GLIQSDQELFSSPnATDTIPLVR            | 2851         |
| 6   | XylMan2GlcNAc2                    | SFAnSTQTFNFAFVEAMDR                | 3048         |
| 7   | FucGlcNAc                         | LHFHDCFVNGCDASILLDnTTSFR           | 3074         |
| 8   | XylMan3FucGlcNAc2                 | GLCPLNGnLSALVDFDLR                 | 3089         |
| 9   | Man3FucGlcNAc2                    | SFAnSTQTFNFAFVEAMDR                | 3222         |
| 10  | XylMan3FucGlcNAc2                 | QLTPTFYDNSCPnVSNIVR                | 3322         |
| 11  | XylMan3FucGlcNAc2                 | SFAnSTQTFNFAFVEAMDR                | 3354         |
| 12  | XylMan3FucGlcNAc2                 | SFAnSTQTFNFAFVEAM*DR               | 3370         |
| 13  | XylMan2FucGlcNAc2                 | GLIQSDQELFSSPnATDTIPLVR            | 3511         |
| 14  | XylMan3GlcNAc2                    | GLIQSDQELFSSPnATDTIPLVR            | 3527         |
| 15  | Man3FucGlcNAc2                    | GLIQSDQELFSSPNATDTIPLVR            | 3539         |
| 16  | XylMan3FucGlcNAc2                 | NQCRGLCPLNGnLSALVDFDLR             | 3607         |
| 17  | XylMan3FucGlcNAc2                 | GLIQSDQELFSSPnATDTIPLVR            | 3672         |
| 18  | Man2GlcNAc2                       | LHFHDCFVNGCDASILLDnTTSFRTEK        | 3812         |
| 19  | XylMan3FucGlcNAc2                 | LHFHDCFVNGCDASILLDnTTSFR           | 3894         |
| 20  | XylMan3GlcNAc2                    | QLTPTFYDNSC(AAVESACPR)PnVSNIVR-H2O | 4057         |
| 21  | XylMan3FucGlcNAc2                 | QLTPTFYDNSC(AAVESACPR)PnVSNIVR     | 4221         |
| 22  | XylMan2FucGlcNAc2, XylMan2GlcNAc2 | LYnFSNTGLPDPTLnTTYLQTLR            | 4821         |
| 23  | XylMan3FucGlcNAc2, XylMan3GlcNAc2 | LYnFSNTGLPDPTLnTTYLQTLR            | 4838         |
| 24  | Man3FucGlcNAc2, XylMan3FucGlcNAc2 | LYnFSNTGLPDPTLnTTYLQTLR            | 4852         |
| 25  | XylMan3FucGlcNAc2, XylMan3GlcNAc2 | LYnFSNTGLPDPTLnTTYLQTLR            | 4984         |

425

426

427

428

429

430

432 Table S3 Detailed information about the identified N-glycopeptides captured by the  
 433 HFH-COFs@Au@GSH from human serum. The lower case letter n represent N-  
 434 glycosylation site.

| NO. | Protein ID | Protein Accession   | Peptide                           | Mass      |
|-----|------------|---------------------|-----------------------------------|-----------|
| 1   | 1          | P02768 (ALBU_HUMAN) | R.nECFLQHKDD.N                    | 1304.5455 |
| 2   | 1          | P02768 (ALBU_HUMAN) | R.nECFLQHK.D                      | 1074.4917 |
| 3   | 1          | P02768 (ALBU_HUMAN) | R.nECFLQHKD.D                     | 1189.5186 |
| 4   | 1          | P02768 (ALBU_HUMAN) | R.nECFLQHKDDNP.L                  | 1996.9061 |
| 5   | 1          | P02768 (ALBU_HUMAN) | Q.EPERnECFLQHKDDNP.L              | 2507.1611 |
| 6   | 1          | P02768 (ALBU_HUMAN) | R.nECFLQHKDDNP.L                  | 1629.6842 |
| 7   | 1          | P02768 (ALBU_HUMAN) | A.DCCAKQEPERnECFLQHKDDNP.L        | 3269.4399 |
| 8   | 1          | P02768 (ALBU_HUMAN) | R.nECFLQHKDDN.P                   | 1418.5885 |
| 9   | 1          | P02768 (ALBU_HUMAN) | n.ECFLQHKDDNP.L                   | 1881.8792 |
| 10  | 1          | P02768 (ALBU_HUMAN) | R.nECFLQH.K                       | 946.3967  |
| 11  | 1          | P02768 (ALBU_HUMAN) | C.AKQEPERnECFLQHKDDNP.L           | 2834.3518 |
| 12  | 1          | P02768 (ALBU_HUMAN) | K.QEPERnECFLQHKDDNP.L             | 2636.2036 |
| 13  | 1          | P02768 (ALBU_HUMAN) | R.ETYGEMADCCAKQEPERnECFLQHKDDNP.L | 4050.7354 |
| 14  | 4          | P00738 (HPT_HUMAN)  | K.VVLHPnYSQVDIGLIK.L              | 2036.167  |
| 15  | 4          | P00738 (HPT_HUMAN)  | K.NLFLnHSEnATAK.D                 | 1574.7212 |
| 16  | 4          | P00738 (HPT_HUMAN)  | E.nATAKDIAPTLTLYVGKK.Q            | 1904.0618 |
| 17  | 4          | P00738 (HPT_HUMAN)  | K.VVLHPnYSQVDIGLIK.L              | 1794.9879 |
| 18  | 4          | P00738 (HPT_HUMAN)  | N.LFLnHSEnATAK.D                  | 1345.6514 |
| 19  | 4          | P00738 (HPT_HUMAN)  | K.MVSHHnLTTGATLINEQWLLTTAK.N      | 2695.364  |
| 20  | 4          | P00738 (HPT_HUMAN)  | L.TTAKNLFLnHSEnATAK.D             | 1860.9218 |
| 21  | 4          | P00738 (HPT_HUMAN)  | K.NLFLnHSEnATAK.D                 | 1460.6783 |
| 22  | 4          | P00738 (HPT_HUMAN)  | K.MVSHHnLTTG.A                    | 1096.4972 |
| 23  | 4          | P00738 (HPT_HUMAN)  | K.NLFLnHSEnATAKDIAPTLTLYVGKK.Q    | 2859.5017 |
| 24  | 4          | P00738 (HPT_HUMAN)  | K.MVSHHnLTT.G                     | 1039.4757 |
| 25  | 4          | P00738 (HPT_HUMAN)  | F.LnHSEnATAK.D                    | 1085.4989 |
| 26  | 4          | P00738 (HPT_HUMAN)  | L.FLnHSEnATAK.D                   | 1232.5673 |
| 27  | 4          | P00738 (HPT_HUMAN)  | K.MVSHHnLT.T                      | 938.428   |
| 28  | 4          | P00738 (HPT_HUMAN)  | K.MVSHHnLTTGA.T                   | 1167.5343 |
| 29  | 4          | P00738 (HPT_HUMAN)  | K.NLFLnHSEnA.T                    | 1159.5145 |
| 30  | 4          | P00738 (HPT_HUMAN)  | K.NLFLnHSEnATA.K                  | 1331.5994 |
| 31  | 4          | P00738 (HPT_HUMAN)  | K.NLFLnHSEnATAKDIAPTLTLY.V        | 2447.2219 |
| 32  | 4          | P00738 (HPT_HUMAN)  | K.NLFLnHSE.N                      | 973.4505  |
| 33  | 4          | P00738 (HPT_HUMAN)  | K.NLFLnHSEnAT.A                   | 1260.5623 |
| 34  | 9          | P0C0L4 (CO4A_HUMAN) | R.FSDGLESnSSTQFEVK.K              | 1774.7897 |
| 35  | 9          | P0C0L4 (CO4A_HUMAN) | R.GLnVTLSSTGR.N                   | 1104.5775 |

|    |    |                      |                             |           |
|----|----|----------------------|-----------------------------|-----------|
| 36 | 9  | P0C0L4 (CO4A_HUMAN)  | G.LnVTLSSSTGR.N             | 1047.556  |
| 37 | 9  | P0C0L4 (CO4A_HUMAN)  | R.FSDGLESnSSTQFEVKK.Y       | 1902.8846 |
| 38 | 10 | P0C0L5 (CO4B_HUMAN)  | R.FSDGLESnSSTQFEVKK.K       | 1774.7897 |
| 39 | 10 | P0C0L5 (CO4B_HUMAN)  | R.GLnVTLSSSTGR.N            | 1104.5775 |
| 40 | 10 | P0C0L5 (CO4B_HUMAN)  | G.LnVTLSSSTGR.N             | 1047.556  |
| 41 | 10 | P0C0L5 (CO4B_HUMAN)  | R.FSDGLESnSSTQFEVKK.Y       | 1902.8846 |
| 42 | 3  | P63261 (ACTG_HUMAN)  | M.EEEIAALVIDnGSGMCK.A       | 1877.8386 |
| 43 | 3  | P63261 (ACTG_HUMAN)  | M.EEEIAALVIDnGSGM.C         | 1604.7239 |
| 44 | 14 | P02671 (FIBA_HUMAN)  | N.NPDWGTFFEEVSGnVSPGTR.R    | 2047.9235 |
| 45 | 11 | P01857 (IGHG1_HUMAN) | K.TKPREEQYnSTYR.V           | 1671.7853 |
| 46 | 11 | P01857 (IGHG1_HUMAN) | R.EEQYnSTYR.V               | 1189.4888 |
| 47 | 11 | P01857 (IGHG1_HUMAN) | R.EEQYnSTYRVVSVL.T          | 1686.8101 |
| 48 | 11 | P01857 (IGHG1_HUMAN) | K.TKPREEQYnSTYRVV.S         | 1869.922  |
| 49 | 11 | P01857 (IGHG1_HUMAN) | K.TKPREEQYnSTYRVVSVL.T      | 2169.1064 |
| 50 | 11 | P01857 (IGHG1_HUMAN) | N.AKTKPREEQYnSTYR.V         | 1870.9172 |
| 51 | 54 | P02765 (FETUA_HUMAN) | N.AQNnGSNFQLEEISR.A         | 1706.786  |
| 52 | 54 | P02765 (FETUA_HUMAN) | K.VCQDCPLLAPLnDTR.V         | 1771.8232 |
| 53 | 54 | P02765 (FETUA_HUMAN) | L.APLnDTRVVHAAK.A           | 1391.7521 |
| 54 | 54 | P02765 (FETUA_HUMAN) | A.AFNAQNnGSNFQLEEISR.A      | 2038.9344 |
| 55 | 54 | P02765 (FETUA_HUMAN) | R.KVCQDCPLLAPLnDTR.V        | 1899.9182 |
| 56 | 54 | P02765 (FETUA_HUMAN) | Q.NnGSNFQLEEISR.A           | 1507.6903 |
| 57 | 54 | P02765 (FETUA_HUMAN) | N.nGSNFQLEEISR.A            | 1393.6473 |
| 58 | 54 | P02765 (FETUA_HUMAN) | n.DTRVVHAAK.A               | 995.5512  |
| 59 | 54 | P02765 (FETUA_HUMAN) | K.AALAAFNAQNnGSNFQLEEISR.A  | 2366.1138 |
| 60 | 54 | P02765 (FETUA_HUMAN) | Q.DCPLLAPLnDTR.V            | 1384.6656 |
| 61 | 54 | P02765 (FETUA_HUMAN) | A.LAAFNAQNnGSNFQLEEISR.A    | 2223.0557 |
| 62 | 54 | P02765 (FETUA_HUMAN) | K.AALAAFNAQNnGSNFQLE.E      | 1879.87   |
| 63 | 54 | P02765 (FETUA_HUMAN) | L.APLnDTR.V                 | 786.3871  |
| 64 | 54 | P02765 (FETUA_HUMAN) | L.AAFNAQNnGSNFQLEEISR.A     | 2109.9714 |
| 65 | 2  | P60709 (ACTB_HUMAN)  | M.DDDIAALVVDnGSGMCK.A       | 1821.776  |
| 66 | 26 | P02787 (TRFE_HUMAN)  | R.QQHLFGSnVTDCSGNFCLFR.S    | 2515.1008 |
| 67 | 26 | P02787 (TRFE_HUMAN)  | S.nVTDCSGNFCLFR.S           | 1589.6603 |
| 68 | 26 | P02787 (TRFE_HUMAN)  | F.GSnVTDCSGNFCLFR.S         | 1733.7137 |
| 69 | 26 | P02787 (TRFE_HUMAN)  | R.QQHLFGSnVTDCSGNF.C        | 1938.8167 |
| 70 | 26 | P02787 (TRFE_HUMAN)  | K.ILRQQHLFGSnVTDCSGNFCLFR.S | 2897.3701 |
| 71 | 26 | P02787 (TRFE_HUMAN)  | K.ILRQQHLFGSnVTD.C          | 1755.8904 |
| 72 | 26 | P02787 (TRFE_HUMAN)  | H.LFGSnVTDCSGNFCLFR.S       | 1993.8662 |
| 73 | 26 | P02787 (TRFE_HUMAN)  | K.ILRQQHLFGSnVTDCSGNF.C     | 2321.0859 |
| 74 | 26 | P02787 (TRFE_HUMAN)  | R.QQHLFGSnVTD.C             | 1373.6211 |
| 75 | 21 | P04264 (K2C1_HUMAN)  | M.DNnRSLDLSIIAEVK.A         | 1800.9218 |
| 76 | 21 | P04264 (K2C1_HUMAN)  | M.QTQISETNVILSMDNnR.S       | 1977.9426 |
| 77 | 21 | P04264 (K2C1_HUMAN)  | Q.TQISETNVILSMDNnR.S        | 1833.889  |
| 78 | 21 | P04264 (K2C1_HUMAN)  | Q.ISETNVILSMDNnR.S          | 1620.7777 |
| 79 | 21 | P04264 (K2C1_HUMAN)  | S.ETNVILSMDNnR.S            | 1420.6616 |

|     |    |                      |                              |           |
|-----|----|----------------------|------------------------------|-----------|
| 80  | 21 | P04264 (K2C1_HUMAN)  | L.SMDNnRSLDLDSIIAEVK.A       | 2018.9943 |
| 81  | 24 | P01859 (IGHG2_HUMAN) | K.TKPREEQFnSTFR.V            | 1639.7954 |
| 82  | 24 | P01859 (IGHG2_HUMAN) | R.EEQFnSTFR.V                | 1157.4989 |
| 83  | 24 | P01859 (IGHG2_HUMAN) | K.TKPREEQFnSTFRVVSVL.T       | 2137.1167 |
| 84  | 24 | P01859 (IGHG2_HUMAN) | K.TKPREEQFnSTFRVV.S          | 1837.9323 |
| 85  | 24 | P01859 (IGHG2_HUMAN) | N.AKTKPREEQFnSTFR.V          | 1838.9275 |
| 86  | 13 | P08670 (VIME_HUMAN)  | R.DGQVInETSQHDDLE            | 1835.7922 |
| 87  | 13 | P08670 (VIME_HUMAN)  | R.QDVDnASLAR.L               | 1087.5258 |
| 88  | 18 | P01860 (IGHG3_HUMAN) | R.EEQYnSTFR.V                | 1173.4938 |
| 89  | 48 | P01591 (IGJ_HUMAN)   | R.NIRIIVPLNNREnISDPTSPLR.T   | 2531.3818 |
| 90  | 48 | P01591 (IGJ_HUMAN)   | R.IVLVDnKCKCAR.I             | 1474.7748 |
| 91  | 48 | P01591 (IGJ_HUMAN)   | N.NREnISDPTSPLRTR.F          | 1755.8864 |
| 92  | 48 | P01591 (IGJ_HUMAN)   | R.IIVPLNNREnISDPTSPLR.T      | 2149.1379 |
| 93  | 48 | P01591 (IGJ_HUMAN)   | R.NIRIIVPLNNREnIS.D          | 1764.9846 |
| 94  | 48 | P01591 (IGJ_HUMAN)   | R.NIRIIVPLNNREnISD.P         | 1880.9956 |
| 95  | 48 | P01591 (IGJ_HUMAN)   | R.EnISDPTSPLR.T              | 1228.5935 |
| 96  | 48 | P01591 (IGJ_HUMAN)   | R.IVLVDnKCK.C                | 1088.59   |
| 97  | 48 | P01591 (IGJ_HUMAN)   | R.NIRIIVPLNNREnISDPTSPLRTR.F | 2788.5308 |
| 98  | 48 | P01591 (IGJ_HUMAN)   | R.IIVPLNNREnISD.P            | 1497.7675 |
| 99  | 48 | P01591 (IGJ_HUMAN)   | R.IVLVDnK.C                  | 799.4803  |
| 100 | 48 | P01591 (IGJ_HUMAN)   | R.IIVPLNNREnIS.D             | 1382.7405 |
| 101 | 48 | P01591 (IGJ_HUMAN)   | L.NNREnISDPTSPLRTR.F         | 1869.9293 |
| 102 | 48 | P01591 (IGJ_HUMAN)   | L.NNREnISDPTSPLR.T           | 1612.7805 |
| 103 | 48 | P01591 (IGJ_HUMAN)   | R.IIVPLNNREnISDPTSPLR.R      | 1992.0527 |
| 104 | 48 | P01591 (IGJ_HUMAN)   | R.IIVPLNNREnISDPTSPLRTR.F    | 2406.2866 |
| 105 | 48 | P01591 (IGJ_HUMAN)   | N.NREnISDPTSPLR.T            | 1497.7535 |
| 106 | 27 | P01024 (CO3_HUMAN)   | K.SLKVVPEGIRMnKTVAVR.T       | 1997.1455 |
| 107 | 27 | P01024 (CO3_HUMAN)   | R.MnKTVAVR.T                 | 918.4957  |
| 108 | 27 | P01024 (CO3_HUMAN)   | K.SLKVVPEGIRMnK.T            | 1470.8228 |
| 109 | 27 | P01024 (CO3_HUMAN)   | K.TVLPATNHMGnVFTFIPANR.E     | 2255.137  |
| 110 | 27 | P01024 (CO3_HUMAN)   | E.GIRMnKTVAVR.T              | 1244.7023 |
| 111 | 27 | P01024 (CO3_HUMAN)   | K.VVPEGIRMnKTVAVR.T          | 1667.9504 |
| 112 | 27 | P01024 (CO3_HUMAN)   | K.VVPEGIRMnK.T               | 1142.6117 |
| 113 | 27 | P01024 (CO3_HUMAN)   | G.IRMnKTVAVR.T               | 1187.6808 |
| 114 | 74 | P25311 (ZA2G_HUMAN)  | R.FGCEIEnR.S                 | 1138.4713 |
| 115 | 49 | P02790 (HEMO_HUMAN)  | R.NGTGHGnSTHHGPEYMR.C        | 1852.7548 |
| 116 | 49 | P02790 (HEMO_HUMAN)  | K.ALPQPQnVTSLLGCTH           | 1735.8563 |
| 117 | 49 | P02790 (HEMO_HUMAN)  | N.AAKALPQPQnVTSLLGCTH        | 2006.0255 |
| 118 | 49 | P02790 (HEMO_HUMAN)  | R.SWPAVGnCSSALR.W            | 1404.6456 |
| 119 | 49 | P02790 (HEMO_HUMAN)  | A.LPQPQnVTSLLGCTH            | 1664.8192 |
| 120 | 49 | P02790 (HEMO_HUMAN)  | L.PQPQnVTSLLGCTH             | 1551.7351 |
| 121 | 49 | P02790 (HEMO_HUMAN)  | A.AKALPQPQnVTSLLGCTH         | 1934.9884 |
| 122 | 49 | P02790 (HEMO_HUMAN)  | Q.nVTSLLGCTH                 | 1101.5125 |
| 123 | 49 | P02790 (HEMO_HUMAN)  | Q.PQnVTSLLGCTH               | 1326.6238 |

|     |    |                      |                                                    |           |
|-----|----|----------------------|----------------------------------------------------|-----------|
| 124 | 49 | P02790 (HEMO_HUMAN)  | n.VTSLLGCTH                                        | 986.4855  |
| 125 | 49 | P02790 (HEMO_HUMAN)  | G.nSTHHGPEYMR.C                                    | 1328.5568 |
| 126 | 49 | P02790 (HEMO_HUMAN)  | Y.SDVEKLNAAKALPQPQnVTSLLGCTH                       | 2791.4175 |
| 127 | 49 | P02790 (HEMO_HUMAN)  | S.DVEKLNAAKALPQPQnVTSLLGCTH                        | 2704.3853 |
| 128 | 49 | P02790 (HEMO_HUMAN)  | P.QnVTSLLGCTH                                      | 1229.571  |
| 129 | 49 | P02790 (HEMO_HUMAN)  | A.KALPQPQnVTSLLGCTH                                | 1863.9513 |
| 130 | 49 | P02790 (HEMO_HUMAN)  | K.SLGPhSCSANGPGLYL.I                               | 1605.7457 |
| 131 | 49 | P02790 (HEMO_HUMAN)  | K.SLGPhSCSANGPGLYLIH.G                             | 1855.8887 |
| 132 | 49 | P02790 (HEMO_HUMAN)  | K.ALQPQnVTSLG.C                                    | 1337.719  |
| 133 | 49 | P02790 (HEMO_HUMAN)  | K.ALQPQnVTSLG.G                                    | 1280.6976 |
| 134 | 49 | P02790 (HEMO_HUMAN)  | P.QPQnVTSLGCTH                                     | 1454.6824 |
| 135 | 49 | P02790 (HEMO_HUMAN)  | G.nCSSALR.W                                        | 807.3545  |
| 136 | 19 | P05787 (K2C8_HUMAN)  | K.AQYEDIA n.R.S                                    | 1078.5043 |
| 137 | 19 | P05787 (K2C8_HUMAN)  | R.GGLGGGYGGASGMGGITAVTV n.QSLLSPLVLEVDPNIA<br>VR.T | 3941.0203 |
| 138 | 19 | P05787 (K2C8_HUMAN)  | R.LESGM n.MSIHTK.T                                 | 1506.6807 |
| 139 | 28 | P10909 (CLUS_HUMAN)  | R.EIRH n.STGCLR.M                                  | 1342.6411 |
| 140 | 28 | P10909 (CLUS_HUMAN)  | R.H n.STGCLR.M                                     | 944.4134  |
| 141 | 28 | P10909 (CLUS_HUMAN)  | K.KKKEDAL n.ETR.E                                  | 1331.7045 |
| 142 | 28 | P10909 (CLUS_HUMAN)  | K.KKEDAL n.ETR.E                                   | 1203.6095 |
| 143 | 28 | P10909 (CLUS_HUMAN)  | K.KKEDAL n.ETRESETK.L                              | 1777.8694 |
| 144 | 28 | P10909 (CLUS_HUMAN)  | K.KEDAL n.ETRESETK.L                               | 1649.7744 |
| 145 | 28 | P10909 (CLUS_HUMAN)  | K.KEDAL n.ETR.E                                    | 1075.5145 |
| 146 | 38 | P02749 (APOH_HUMAN)  | K.LG n.WSAMPSCK.A                                  | 1250.5424 |
| 147 | 38 | P02749 (APOH_HUMAN)  | D.TITCTTHG n.WTKLPECR.E                            | 2074.9565 |
| 148 | 38 | P02749 (APOH_HUMAN)  | n.DTITCTTHG n.WTKLPECR.E                           | 2189.9834 |
| 149 | 38 | P02749 (APOH_HUMAN)  | F.G n.DTITCTTHG n.WTKLPECR.E                       | 2362.0317 |
| 150 | 38 | P02749 (APOH_HUMAN)  | G.nWTKLPECR.E                                      | 1203.5707 |
| 151 | 38 | P02749 (APOH_HUMAN)  | F.ECLPQHAMFG n.DTITCTTHG n.WTKLPECR.E              | 3475.5054 |
| 152 | 38 | P02749 (APOH_HUMAN)  | R.VYKPSAG n.NSLYR.D                                | 1469.715  |
| 153 | 38 | P02749 (APOH_HUMAN)  | H.G n.WTKLPECR.E                                   | 1260.592  |
| 154 | 38 | P02749 (APOH_HUMAN)  | C.TTHG n.WTKLPECR.E                                | 1599.7463 |
| 155 | 38 | P02749 (APOH_HUMAN)  | R.VYKPSAG n.NSLYRDTAVF.E                           | 2001.9795 |
| 156 | 38 | P02749 (APOH_HUMAN)  | R.VYKPSAG n.NSLY.R                                 | 1312.6299 |
| 157 | 38 | P02749 (APOH_HUMAN)  | R.VYKPSAG n.NSLYRDTAVFECLPQH.A                     | 2765.323  |
| 158 | 38 | P02749 (APOH_HUMAN)  | H.AMFG n.DTITCTTHG n.WTKLPECR.E                    | 2726.1887 |
| 159 | 38 | P02749 (APOH_HUMAN)  | G.nDTITCTTHG n.WTKLPECR.E                          | 2304.0264 |
| 160 | 38 | P02749 (APOH_HUMAN)  | R.DTAVFECLPQHAMFG n.DTITCTTHG n.WTKLPECR.E         | 4024.7488 |
| 161 | 31 | P13645 (K1C10_HUMAN) | R.nVSTGDVNVEMNAAPGVDLTQLLN.N                       | 2486.1958 |
| 162 | 31 | P13645 (K1C10_HUMAN) | R.nVSTGDVNVEMNAAPGVDLTQLLNNMR.S                    | 2903.3752 |
| 163 | 31 | P13645 (K1C10_HUMAN) | n.LTTDNANILLQIDNAR.L                               | 1783.9427 |
| 164 | 31 | P13645 (K1C10_HUMAN) | R.nVSTGDVNVEMNAAPGVDLTQLLN.N                       | 2372.1528 |
| 165 | 30 | P01876 (IGHA1_HUMAN) | G.SEA n.LTCTLTGLR.D                                | 1435.6976 |
| 166 | 30 | P01876 (IGHA1_HUMAN) | E.DLLGSEA n.LTCTLTGLR.D                            | 1946.9983 |

|     |     |                      |                                  |           |
|-----|-----|----------------------|----------------------------------|-----------|
| 167 | 30  | P01876 (IGHA1_HUMAN) | K.TIDRLAGKPTHVnVSVVM.A           | 1937.0404 |
| 168 | 30  | P01876 (IGHA1_HUMAN) | R.LAGKPTHVnVSVVMAEVDGTC.Y        | 2184.0554 |
| 169 | 30  | P01876 (IGHA1_HUMAN) | L.GSEAnLTCTLTGLR.D               | 1492.7191 |
| 170 | 30  | P01876 (IGHA1_HUMAN) | R.LAGKPTHVnVS.V                  | 1122.6033 |
| 171 | 30  | P01876 (IGHA1_HUMAN) | K.TIDRLAGKPTHVnVS.V              | 1607.863  |
| 172 | 30  | P01876 (IGHA1_HUMAN) | R.LAGKPTHVnVSVVM.A               | 1451.7806 |
| 173 | 41  | P01861 (IGHG4_HUMAN) | R.EEQFnSTYR.V                    | 1173.4938 |
| 174 | 41  | P01861 (IGHG4_HUMAN) | K.TKPREEQFnSTYR.V                | 1655.7903 |
| 175 | 44  | P01877 (IGHA2_HUMAN) | T.AAHPELKTPLTAnITK.S             | 1704.941  |
| 176 | 44  | P01877 (IGHA2_HUMAN) | K.TPLTAnITK.S                    | 958.5335  |
| 177 | 44  | P01877 (IGHA2_HUMAN) | K.SVTCHVKHYTnSSQDVTVPCR.V        | 2475.1272 |
| 178 | 44  | P01877 (IGHA2_HUMAN) | K.HYTnSSQDVTVPCR.V               | 1663.7261 |
| 179 | 44  | P01877 (IGHA2_HUMAN) | G.SEAnLTCTLTGLR.D                | 1435.6976 |
| 180 | 44  | P01877 (IGHA2_HUMAN) | W.SESGQnVTAR.N                   | 1048.4785 |
| 181 | 44  | P01877 (IGHA2_HUMAN) | E.DLLLGSEAnLTCTLTGLR.D           | 1946.9983 |
| 182 | 44  | P01877 (IGHA2_HUMAN) | L.GSEAnLTCTLTGLR.D               | 1492.7191 |
| 183 | 44  | P01877 (IGHA2_HUMAN) | S.VTWSESGQnVTAR.N                | 1434.674  |
| 184 | 96  | P01009 (A1AT_HUMAN)  | R.QLAHQSnSTNIFFSPVS.I            | 1876.8955 |
| 185 | 96  | P01009 (A1AT_HUMAN)  | R.QLAHQSnSTNIFF.S                | 1506.7103 |
| 186 | 67  | Q562R1 (ACTBL_HUMAN) | R.GYnFTTTAER.E                   | 1159.5145 |
| 187 | 105 | P01008 (ANT3_HUMAN)  | R.AAINKWVSnKTEGR.I               | 1574.8052 |
| 188 | 105 | P01008 (ANT3_HUMAN)  | K.WVSnKTEGR.I                    | 1076.525  |
| 189 | 97  | P12259 (FA5_HUMAN)   | R.HLIGKNSVlnSSTAETHSSPYSE.D      | 2357.1135 |
| 190 | 97  | P12259 (FA5_HUMAN)   | K.NSVLlnSSTAETHSSPYSED.P         | 1923.797  |
| 191 | 97  | P12259 (FA5_HUMAN)   | K.NSVLlnSSTAETHSSPYSE.D          | 1808.77   |
| 192 | 97  | P12259 (FA5_HUMAN)   | R.SFRnSSLNQEEEEEF.N              | 1715.7274 |
| 193 | 97  | P12259 (FA5_HUMAN)   | R.SFRnSSLNQEEEEFNLT.A.L          | 2115.9233 |
| 194 | 97  | P12259 (FA5_HUMAN)   | R.SFRnSSLNQEEEEFNLTALALE.N       | 2542.1711 |
| 195 | 60  | Q15149 (PLEC_HUMAN)  | R.NLVDnITGQR.L                   | 1128.5887 |
| 196 | 116 | P04004 (VTNC_HUMAN)  | N.nATVHEQVGGPSLTSDLQAQSK.G       | 2267.103  |
| 197 | 116 | P04004 (VTNC_HUMAN)  | D.DGEEKNnATVHEQVGGPSLTSDLQAQSK.G | 2939.3745 |
| 198 | 116 | P04004 (VTNC_HUMAN)  | Y.DGEEKNnATVHEQVGGPSLTSDLQAQSK.G | 3053.4172 |
| 199 | 78  | P01871 (IGHM_HUMAN)  | R.TVDKSTGKPTLYnVSLVMSDTAGTC      | 2808.3198 |
| 200 | 78  | P01871 (IGHM_HUMAN)  | K.YKnNSDISSTR.G                  | 1284.5946 |
| 201 | 78  | P01871 (IGHM_HUMAN)  | F.SWKYKnNSDISSTR.G               | 1685.8009 |
| 202 | 78  | P01871 (IGHM_HUMAN)  | R.TVDKSTGKPTLYnVSLVMSDTA.G       | 2327.1567 |
| 203 | 78  | P01871 (IGHM_HUMAN)  | R.GLTFQQnASSMCVDPQDTAIR.V        | 2339.0522 |
| 204 | 111 | P04196 (HRG_HUMAN)   | R.VIDFnCTTSSVSSALANTK.D          | 2014.9518 |
| 205 | 59  | P02545 (LMNA_HUMAN)  | R.TALInSTGEEVAMR.K               | 1506.7347 |
| 206 | 153 | P05155 (IC1_HUMAN)   | R.VLSnNSDANLELINTWVAK.N          | 2101.0691 |
| 207 | 153 | P05155 (IC1_HUMAN)   | R.VLSnNSDANLELINTWVAK.N          | 2101.0691 |
| 208 | 153 | P05155 (IC1_HUMAN)   | S.NPhATSSSSQDPESLQDR.G           | 1932.8297 |
| 209 | 153 | P05155 (IC1_HUMAN)   | R.DTFVnASR.T                     | 909.4192  |
| 210 | 153 | P05155 (IC1_HUMAN)   | P.nATSSSSQDPESLQDRGEGK.V         | 2092.9146 |



|     |     |                      |                                   |           |
|-----|-----|----------------------|-----------------------------------|-----------|
| 211 | 153 | P05155 (IC1_HUMAN)   | S.NPnATSSSSQDPESLQDRGEGK.V        | 2303.0261 |
| 212 | 77  | P11142 (HSP7C_HUMAN) | K.VEIIANDQGnR.T                   | 1227.6207 |
| 213 | 77  | P11142 (HSP7C_HUMAN) | K.TVTNAVVTVPAYFnDSQR.Q            | 1980.9905 |
| 214 | 95  | P00747 (PLMN_HUMAN)  | R.FSPATHPSEGLEEnYCR.N             | 1992.8635 |
| 215 | 95  | P00747 (PLMN_HUMAN)  | K.NLDEnYCR.N                      | 1082.4451 |
| 216 | 95  | P00747 (PLMN_HUMAN)  | R.FSPATHPSEGLEEnYCRNPdND.P        | 2548.0562 |
| 217 | 95  | P00747 (PLMN_HUMAN)  | K.TPENYPNAGLTmYCR.N               | 1899.8243 |
| 218 | 104 | O95678 (K2C75_HUMAN) | K.AQYEDIAnR.S                     | 1078.5043 |
| 219 | 80  | P00734 (THRB_HUMAN)  | R.GHVnITR.S                       | 796.4191  |
| 220 | 80  | P00734 (THRB_HUMAN)  | R.SRYPHKPEINSTTHPGADLQEnFCR.N     | 2954.3728 |
| 221 | 80  | P00734 (THRB_HUMAN)  | E.GNCAEGLGTNYRGHVnITR.S           | 2088.9758 |
| 222 | 80  | P00734 (THRB_HUMAN)  | A.ACLEGNCAEGLGTNYRGHVnITR.S       | 2562.1704 |
| 223 | 80  | P00734 (THRB_HUMAN)  | G.NCAEGLGTNYRGHVnITR.S            | 2031.9545 |
| 224 | 80  | P00734 (THRB_HUMAN)  | N.CAEGLGTNYRGHVnITR.S             | 1918.8955 |
| 225 | 98  | P01042 (KNG1_HUMAN)  | R.HGIQYFNnTQH.S                   | 1472.6433 |
| 226 | 98  | P01042 (KNG1_HUMAN)  | K.LNAENnATFYFK.I                  | 1431.667  |
| 227 | 98  | P01042 (KNG1_HUMAN)  | R.HGIQYFNnTQHSSLF.M               | 1906.8599 |
| 228 | 151 | P0DMV9 (HS71B_HUMAN) | K.VEIIANDQGnR.T                   | 1227.6207 |
| 229 | 158 | P17066 (HSP76_HUMAN) | R.VEILANDQGnR.T                   | 1227.6207 |
| 230 | 81  | P00751 (CFAB_HUMAN)  | R.SPYnVSDEISFHCY.D                | 1880.7563 |
| 231 | 81  | P00751 (CFAB_HUMAN)  | R.GSAnRTCQVNGR.W                  | 1320.5841 |
| 232 | 102 | P08238 (HS90B_HUMAN) | R.GVVDESLPLnISR.E                 | 1512.7783 |
| 233 | 102 | P08238 (HS90B_HUMAN) | R.ELISnASDALDK.I                  | 1274.6354 |
| 234 | 102 | P08238 (HS90B_HUMAN) | R.IMKAQALRDnSTMGYMAK.K            | 2208.0046 |
| 235 | 99  | P35221 (CTNA1_HUMAN) | K.nTSDVISAAsK.K                   | 1004.5138 |
| 236 | 113 | P13639 (EF2_HUMAN)   | K.AYLPVnESFGFTADLR.S              | 1798.8889 |
| 237 | 131 | P19338 (NUCL_HUMAN)  | K.TLVLSnLSYSATEETLQEVFEK.A        | 2500.2583 |
| 238 | 123 | P05156 (CFAI_HUMAN)  | K.FLNnGTCTAEGK.F                  | 1311.5765 |
| 239 | 123 | P05156 (CFAI_HUMAN)  | K.nGTAVCATNRR.S                   | 1219.5728 |
| 240 | 106 | Q13813 (SPTN1_HUMAN) | K.EELYQnLTR.E                     | 1164.5775 |
| 241 | 125 | P08603 (CFAH_HUMAN)  | R.ISEEnETTCYMGK.W                 | 1561.6276 |
| 242 | 125 | P08603 (CFAH_HUMAN)  | K.MDGASnVTCINSR.W                 | 1424.6024 |
| 243 | 125 | P08603 (CFAH_HUMAN)  | K.IPCSQPPQIEHGTLnSSR.S            | 2020.9636 |
| 244 | 125 | P08603 (CFAH_HUMAN)  | N.GnWTEPPQCK.D                    | 1216.5183 |
| 245 | 188 | P35542 (SAA4_HUMAN)  | G.nSSTVLEDSKSNEKAEEWGR.S          | 2266.0349 |
| 246 | 178 | P04003 (C4BPA_HUMAN) | C.DSGYGVVGPQSITCSGnR.T            | 1853.8214 |
| 247 | 178 | P04003 (C4BPA_HUMAN) | R.LSVDKDQYVEPEnVTIQCDSGYGVVGPQS.I | 3183.4553 |
| 248 | 178 | P04003 (C4BPA_HUMAN) | R.LSVDKDQYVEPEnVTIQC.D            | 2136.9885 |
| 249 | 256 | P01019 (ANGT_HUMAN)  | H.LVIHnESTCEQLAK.A                | 1641.8032 |
| 250 | 256 | P01019 (ANGT_HUMAN)  | H.nESTCEQLAK.A                    | 1179.5078 |
| 251 | 138 | Q9BVA1 (TBB2B_HUMAN) | K.MSATFIGnSTAIQELFK.R             | 1872.9291 |
| 252 | 138 | Q9BVA1 (TBB2B_HUMAN) | K.nSSYFVEWIPNNVK.T                | 1695.8257 |
| 253 | 139 | Q13885 (TBB2A_HUMAN) | K.MSATFIGnSTAIQELFK.R             | 1872.9291 |
| 254 | 139 | Q13885 (TBB2A_HUMAN) | K.nSSYFVEWIPNNVK.T                | 1695.8257 |

|     |     |                      |                                                      |           |
|-----|-----|----------------------|------------------------------------------------------|-----------|
| 255 | 126 | P07437 (TBB5_HUMAN)  | K.nSSYFVEWIPNNVK.T                                   | 1695.8257 |
| 256 | 126 | P07437 (TBB5_HUMAN)  | K.MAVTFI <sub>Gn</sub> STAIQELFK.R                   | 1884.9655 |
| 257 | 191 | P05090 (APOD_HUMAN)  | R.ADGTVNQIEGEATPV <sub>nL</sub> TEPAK.L              | 2254.0964 |
| 258 | 191 | P05090 (APOD_HUMAN)  | R.ADGTVNQIEGEATPV <sub>nL</sub> TEPAKLEVK.F          | 2723.3865 |
| 259 | 191 | P05090 (APOD_HUMAN)  | A.nYSLMENGKIK.V                                      | 1297.6224 |
| 260 | 230 | P07195 (LDHB_HUMAN)  | V.SLQELNPEMGTD <sub>n</sub> DSENWK.E                 | 2222.9272 |
| 261 | 128 | P17936 (IBP3_HUMAN)  | Y.KVDYESQSTDTQ <sub>n</sub> FSSSESKR.E               | 2335.0564 |
| 262 | 128 | P17936 (IBP3_HUMAN)  | R.GLCV <sub>n</sub> ASAVSR.L                         | 1133.5499 |
| 263 | 177 | P07900 (HS90A_HUMAN) | R.GVVDEDLPL <sub>n</sub> ISR.E                       | 1512.7783 |
| 264 | 221 | P02748 (CO9_HUMAN)   | R.CNGD <sub>n</sub> DCGDFSEDDCESEPRPCR.D             | 3004.0125 |
| 265 | 194 | P02763 (A1AG1_HUMAN) | R.QDQCIY <sub>n</sub> TTYLNVQR.E                     | 1915.8734 |
| 266 | 194 | P02763 (A1AG1_HUMAN) | Y. <sub>n</sub> TTYLNVQR.E                           | 1108.5513 |
| 267 | 194 | P02763 (A1AG1_HUMAN) | F.FYFTPhKTEDTIFLR.E                                  | 1891.9355 |
| 268 | 194 | P02763 (A1AG1_HUMAN) | F.YFTPhKTEDTIFLR.E                                   | 1744.8672 |
| 269 | 194 | P02763 (A1AG1_HUMAN) | R.QDQCIY <sub>n</sub> TTYLNVQRE <sub>n</sub> GTISR.Y | 2674.2292 |
| 270 | 180 | Q16643 (DREB_HUMAN)  | K.VAEFFQGV <sub>DVIVn</sub> ASSVEDIDAGAIGQR.L        | 2905.4458 |
| 271 | 196 | P19652 (A1AG2_HUMAN) | N.LVPVPI <sub>Tn</sub> ATLDR.I                       | 1408.7926 |
| 272 | 196 | P19652 (A1AG2_HUMAN) | A.NLVPVPI <sub>Tn</sub> ATLDR.I                      | 1522.8354 |
| 273 | 196 | P19652 (A1AG2_HUMAN) | R.QNQCFY <sub>n</sub> SSYLVNQR.E                     | 1920.8424 |
| 274 | 196 | P19652 (A1AG2_HUMAN) | C.ANLVPVPI <sub>Tn</sub> ATLDR.I                     | 1593.8726 |
| 275 | 196 | P19652 (A1AG2_HUMAN) | A.QIPLCANLVPVPI <sub>Tn</sub> ATLDR.I                | 2205.1826 |
| 276 | 196 | P19652 (A1AG2_HUMAN) | F.FYFTPhKTEDTIFLR.E                                  | 1891.9355 |
| 277 | 196 | P19652 (A1AG2_HUMAN) | F.YFTPhKTEDTIFLR.E                                   | 1744.8672 |
| 278 | 196 | P19652 (A1AG2_HUMAN) | L.VPVPI <sub>Tn</sub> ATLDR.I                        | 1295.7085 |
| 279 | 196 | P19652 (A1AG2_HUMAN) | Y. <sub>n</sub> SSYLVNQR.E                           | 1080.52   |
| 280 | 187 | P35579 (MYH9_HUMAN)  | K.IAQLEEQLD <sub>n</sub> ETK.E                       | 1529.7573 |
| 281 | 362 | P68104 (EF1A1_HUMAN) | R.VETGVLPKPGMVVTFAPV <sub>n</sub> VTTEVK.S           | 2530.3716 |
| 282 | 363 | Q5VTE0 (EF1A3_HUMAN) | R.VETGVLPKPGMVVTFAPV <sub>n</sub> VTTEVK.S           | 2530.3716 |
| 283 | 280 | P01011 (AACT_HUMAN)  | K.LINDYVK <sub>n</sub> GTR.G                         | 1292.6725 |
| 284 | 280 | P01011 (AACT_HUMAN)  | K.KLINDYVK <sub>n</sub> GTR.G                        | 1420.7673 |
| 285 | 176 | O43790 (KRT86_HUMAN) | R.VSSVPSNSNVVGT <sub>Tn</sub> AC.A                   | 1791.8309 |
| 286 | 265 | P60842 (IF4A1_HUMAN) | R.DIETFY <sub>n</sub> TSIEEMPLNVADLI                 | 2442.1511 |
| 287 | 213 | Q08380 (LG3BP_HUMAN) | R.TVIRPFYL <sub>Tn</sub> SSGVD                       | 1668.8358 |
| 288 | 213 | Q08380 (LG3BP_HUMAN) | R.ALGFEnATQALGR.A                                    | 1347.6782 |
| 289 | 213 | Q08380 (LG3BP_HUMAN) | R.DAGVVCT <sub>n</sub> ETR.S                         | 1221.5295 |
| 290 | 296 | Q03591 (FHR1_HUMAN)  | R.LQNNEN <sub>n</sub> ISCVER.G                       | 1589.7103 |
| 291 | 296 | Q03591 (FHR1_HUMAN)  | N.G <sub>n</sub> WTEPPQCK.D                          | 1216.5183 |
| 292 | 432 | P36980 (FHR2_HUMAN)  | R.LQNNEN <sub>n</sub> ISCVER.G                       | 1589.7103 |
| 293 | 328 | Q6UXB8 (PI16_HUMAN)  | K.SLPNFP <sub>h</sub> TSAT <sub>An</sub> ATGGR.A     | 1776.8279 |
| 294 | 328 | Q6UXB8 (PI16_HUMAN)  | K.SLPNFPNTSAT <sub>An</sub> ATGGRALA.L               | 2031.9861 |
| 295 | 456 | P07357 (CO8A_HUMAN)  | R.VRGSSGWSGGLAQ <sub>n</sub> R.S                     | 1588.7706 |
| 296 | 456 | P07357 (CO8A_HUMAN)  | R.GGSSGWSGGLAQ <sub>n</sub> R.S                      | 1333.6011 |
| 297 | 192 | P19823 (ITIH2_HUMAN) | K.GAFIS <sub>n</sub> FSMTVDGK.T                      | 1473.6809 |
| 298 | 254 | P43652 (AFAM_HUMAN)  | R.YAEDKFnETTEK.S                                     | 1474.6464 |

|     |     |                      |                                         |           |
|-----|-----|----------------------|-----------------------------------------|-----------|
| 299 | 254 | P43652 (AFAM_HUMAN)  | R.DIENFnSTQK.F                          | 1195.5356 |
| 300 | 298 | Q68DL7 (CR063_HUMAN) | R.LAPAWnRTGH.L                          | 1121.573  |
| 301 | 215 | O95445 (APOM_HUMAN)  | M.LnETGQGYQR.F                          | 1165.5364 |
| 302 | 339 | O75882 (ATRN_HUMAN)  | K.AATCINPLnGSVCERPA <sub>n</sub> HSAK.Q | 2368.0898 |
| 303 | 509 | P37802 (TAGL2_HUMAN) | R.YGlnTTDIFQTVDLWEGK.N                  | 2099.021  |
| 304 | 548 | Q9H9S0 (NANOG_HUMAN) | L.SNILnLSYKQVK.T                        | 1405.7928 |
| 305 | 548 | Q9H9S0 (NANOG_HUMAN) | I.LnLSYKQVK.T                           | 1091.6339 |
| 306 | 551 | Q8N7R0 (NANG2_HUMAN) | L.SNILnLSYKQVK.T                        | 1405.7928 |
| 307 | 551 | Q8N7R0 (NANG2_HUMAN) | I.LnLSYKQVK.T                           | 1091.6339 |
| 308 | 574 | Q6NSW7 (NANP8_HUMAN) | I.LnLSYKQVK.T                           | 1091.6339 |
| 309 | 574 | Q6NSW7 (NANP8_HUMAN) | L.SNILnLSYKQVK.T                        | 1406.7769 |

435

436

437

438

439

440

441

442

443

444

445

446

447

448
